# Supplementary material
Source: HighWire-hosted journal article supplement (https://jnm.snmjournals.org/highwire/filestream/94507/field_highwire_adjunct_files/0/121897_Supplemental_Data.pdf)
Supplement: 121897_Supplemental_Data.pdf [file 121897_Supplemental_Data.pdf]

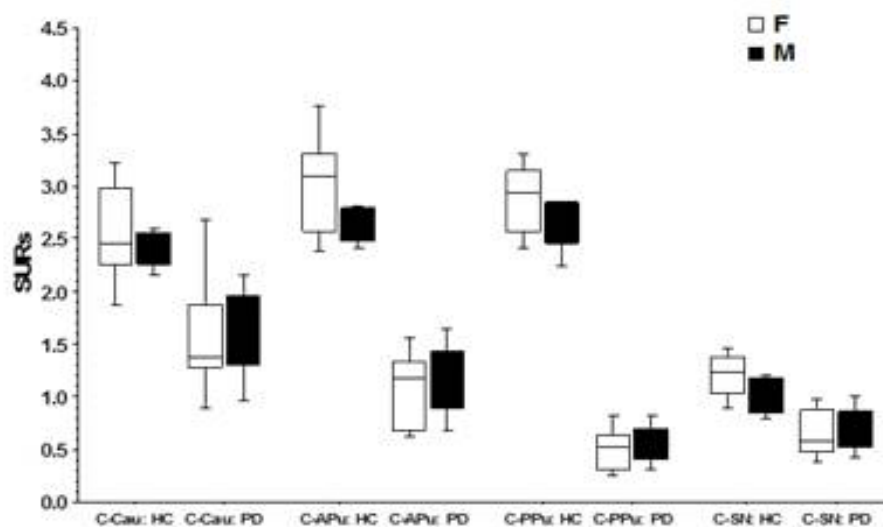

SUPPLEMENTAL FIGURE 1. The SURs of  $^{18}\text{F}$ -DTBZ had no difference between male and female subjects in both PD and HC group.
